# Supplementary material for: Crown ether-containing N-salicylidene aniline derivatives: synthesis, characterization and optical properties
Source: Royal Society of Chemistry journal article supplement (doi:10.1039/c2ce25600b), 2012-01-01
Supplement: c2ce25600b.pdf [file c2ce25600b.pdf]

## Electronic Supplementary Information

### Crown ether-containing *N*-salicylidene aniline derivatives: synthesis, characterization and optical properties

Damir A. Safin,<sup>a</sup> Koen Robeyns<sup>a</sup> and Yann Garcia\*<sup>a</sup>

<sup>a</sup> *Institute of Condensed Matter and Nanosciences, MOST – Inorganic Chemistry, Université Catholique de Louvain, Place L. Pasteur 1, 1348 Louvain-la-Neuve, Belgium. Fax: +32(0) 1047 2330; Tel: +32(0) 1047 2831; E-mail: damir.safin@ksu.ru, yann.garcia@uclouvain.be*

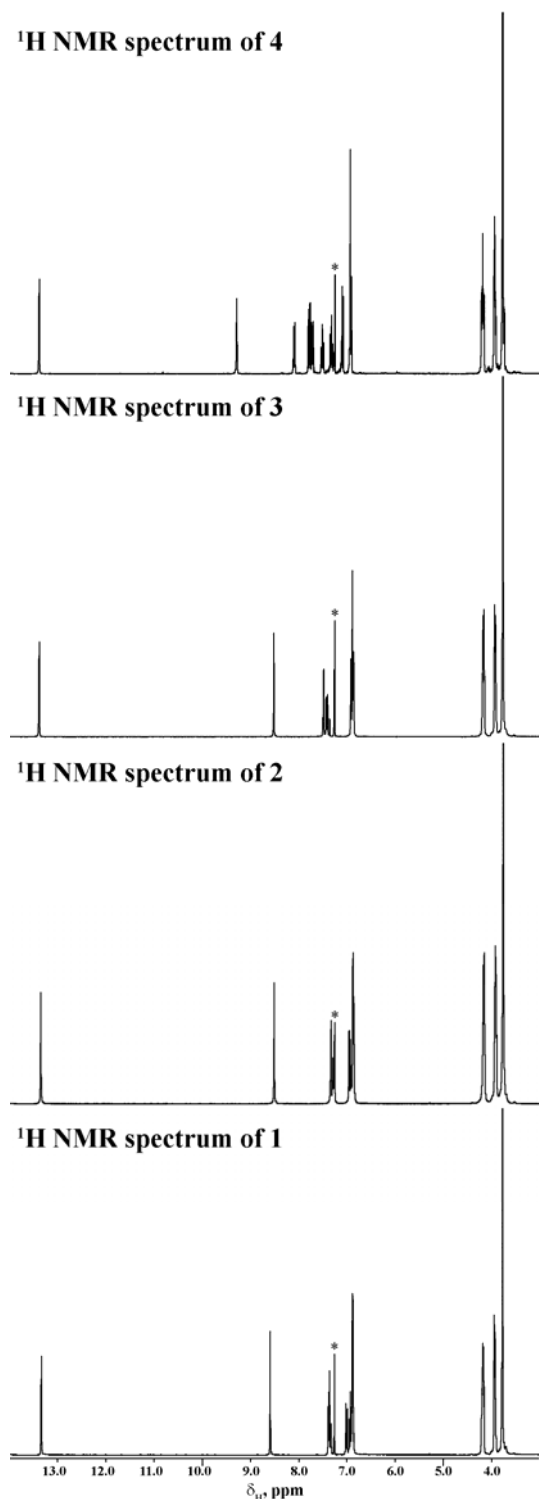

**Fig. S1** <sup>1</sup>H NMR spectra of 1–4. The solvent (CHCl<sub>3</sub>) is marked by an asterisk.

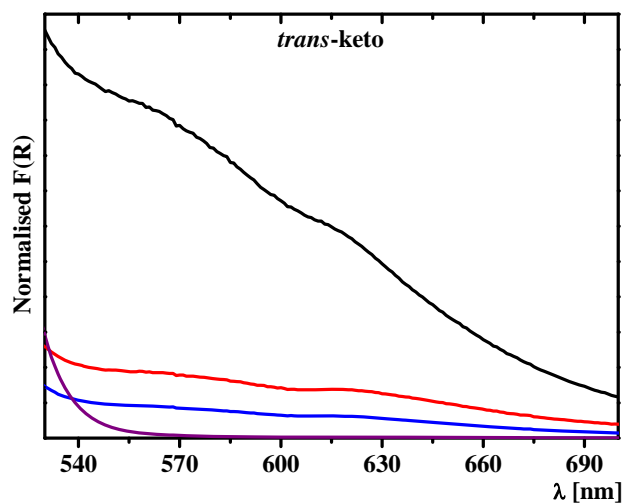

**Fig. S2** A zoomed range of the *trans-keto* form of the Kubelka-Munk spectra of **1** (black), **2** (red), **3** (blue) and **4** (purple) at 298 K.

**Table S1** Selected bond lengths (Å) and bond angles (°) for **1**

| <i>Bond lengths</i>     |           |                         |           |                         |           |
|-------------------------|-----------|-------------------------|-----------|-------------------------|-----------|
| O(1)–C(2)               | 1.348(5)  | O(25)–C(24)             | 1.431(4)  | C(10)–C(11)             | 1.404(4)  |
| O(13)–C(12)             | 1.362(4)  | O(25)–C(26)             | 1.361(4)  | C(10)–C(28)             | 1.373(5)  |
| O(13)–C(14)             | 1.420(4)  | N(9)–C(8)               | 1.269(4)  | C(11)–C(12)             | 1.377(5)  |
| O(16)–C(15)             | 1.413(4)  | N(9)–C(10)              | 1.418(4)  | C(12)–C(26)             | 1.402(4)  |
| O(16)–C(17)             | 1.415(5)  | C(2)–C(3)               | 1.394(6)  | C(14)–C(15)             | 1.495(5)  |
| O(16)–C(17B)            | 1.42(4)   | C(2)–C(7)               | 1.395(5)  | C(17)–C(18)             | 1.487(8)  |
| O(19)–C(18)             | 1.425(6)  | C(3)–C(4)               | 1.367(6)  | C(17B)–C(18B)           | 1.49(4)   |
| O(19)–C(18B)            | 1.41(2)   | C(4)–C(5)               | 1.374(6)  | C(20)–C(21)             | 1.486(6)  |
| O(19)–C(20)             | 1.422(5)  | C(5)–C(6)               | 1.383(6)  | C(23)–C(24)             | 1.492(5)  |
| O(22)–C(21)             | 1.409(5)  | C(6)–C(7)               | 1.382(5)  | C(26)–C(27)             | 1.379(4)  |
| O(22)–C(23)             | 1.426(4)  | C(7)–C(8)               | 1.450(5)  | C(27)–C(28)             | 1.377(5)  |
| <i>Bond angles</i>      |           |                         |           |                         |           |
| C(12)–O(13)–C(14)       | 117.8(3)  | C(5)–C(6)–C(7)          | 121.1(3)  | O(16)–C(17)–C(18)       | 113.0(4)  |
| C(15)–O(16)–C(17)       | 114.7(4)  | C(2)–C(7)–C(6)          | 118.8(3)  | O(19)–C(18)–C(17)       | 116.4(5)  |
| C(15)–O(16)–C(17B)      | 102.6(13) | C(2)–C(7)–C(8)          | 121.9(3)  | O(19)–C(20)–C(21)       | 107.1(3)  |
| C(18)–O(19)–C(20)       | 113.2(3)  | C(6)–C(7)–C(8)          | 119.3(3)  | O(22)–C(21)–C(20)       | 112.4(3)  |
| C(20)–O(19)–C(18B)      | 125.1(11) | N(9)–C(8)–C(7)          | 122.8(3)  | O(22)–C(23)–C(24)       | 111.4(3)  |
| C(21)–O(22)–C(23)       | 116.6(3)  | N(9)–C(10)–C(11)        | 124.3(3)  | O(25)–C(24)–C(23)       | 107.8(3)  |
| C(24)–O(25)–C(26)       | 117.4(2)  | N(9)–C(10)–C(28)        | 117.4(3)  | O(25)–C(26)–C(12)       | 115.8(3)  |
| C(8)–N(9)–C(10)         | 122.2(3)  | C(11)–C(10)–C(28)       | 118.3(3)  | O(25)–C(26)–C(27)       | 125.0(3)  |
| O(1)–C(2)–C(3)          | 118.7(3)  | C(10)–C(11)–C(12)       | 120.6(3)  | C(12)–C(26)–C(27)       | 119.2(3)  |
| O(1)–C(2)–C(7)          | 121.5(3)  | O(13)–C(12)–C(11)       | 125.1(3)  | C(26)–C(27)–C(28)       | 120.2(3)  |
| C(3)–C(2)–C(7)          | 119.8(3)  | O(13)–C(12)–C(26)       | 114.9(3)  | C(10)–C(28)–C(27)       | 121.7(3)  |
| C(2)–C(3)–C(4)          | 120.0(4)  | C(11)–C(12)–C(26)       | 120.0(3)  | O(16)–C(17B)–C(18B)     | 115(3)    |
| C(3)–C(4)–C(5)          | 120.8(4)  | O(13)–C(14)–C(15)       | 107.3(3)  | O(19)–C(18B)–C(17B)     | 105(2)    |
| C(4)–C(5)–C(6)          | 119.5(4)  | O(16)–C(15)–C(14)       | 108.2(2)  |                         |           |
| <i>Torsion angles</i>   |           |                         |           |                         |           |
| C(14)–O(13)–C(12)–C(11) | –13.1(4)  | O(1)–C(2)–C(7)–C(8)     | 0.4(5)    | N(9)–C(10)–C(28)–C(27)  | 178.9(3)  |
| C(14)–O(13)–C(12)–C(26) | 166.2(3)  | C(3)–C(2)–C(7)–C(6)     | 1.5(5)    | C(11)–C(10)–C(28)–C(27) | –0.1(5)   |
| C(12)–O(13)–C(14)–C(15) | –173.8(3) | C(3)–C(2)–C(7)–C(8)     | –178.4(4) | C(10)–C(11)–C(12)–O(13) | 178.6(3)  |
| C(17)–O(16)–C(15)–C(14) | –171.8(4) | C(2)–C(3)–C(4)–C(5)     | 0.8(7)    | C(10)–C(11)–C(12)–C(26) | –0.6(5)   |
| C(15)–O(16)–C(17)–C(18) | 87.8(6)   | C(3)–C(4)–C(5)–C(6)     | –0.7(7)   | O(13)–C(12)–C(26)–O(25) | –0.1(4)   |
| C(20)–O(19)–C(18)–C(17) | –79.8(5)  | C(4)–C(5)–C(6)–C(7)     | 1.0(6)    | O(13)–C(12)–C(26)–C(27) | –179.3(3) |
| C(18)–O(19)–C(20)–C(21) | –149.6(4) | C(5)–C(6)–C(7)–C(2)     | –1.4(6)   | C(11)–C(12)–C(26)–O(25) | 179.2(3)  |
| C(23)–O(22)–C(21)–C(20) | –84.5(4)  | C(5)–C(6)–C(7)–C(8)     | 178.5(4)  | C(11)–C(12)–C(26)–C(27) | 0.1(5)    |
| C(21)–O(22)–C(23)–C(24) | 124.6(3)  | C(2)–C(7)–C(8)–N(9)     | 0.1(6)    | O(13)–C(14)–C(15)–O(16) | 68.8(4)   |
| C(26)–O(25)–C(24)–C(23) | 178.3(3)  | C(6)–C(7)–C(8)–N(9)     | –179.8(4) | O(16)–C(17)–C(18)–O(19) | 74.0(6)   |
| C(24)–O(25)–C(26)–C(12) | –175.3(3) | C(7)–C(8)–N(9)–C(10)    | 176.9(3)  | O(19)–C(20)–C(21)–O(22) | –169.7(3) |
| C(24)–O(25)–C(26)–C(27) | 3.9(5)    | C(11)–C(10)–N(9)–C(8)   | –11.0(5)  | O(22)–C(23)–C(24)–O(25) | –75.1(3)  |
| O(1)–C(2)–C(3)–C(4)     | –180.0(4) | C(28)–C(10)–N(9)–C(8)   | 170.2(3)  | O(25)–C(26)–C(27)–C(28) | –178.6(3) |
| C(7)–C(2)–C(3)–C(4)     | –1.2(6)   | N(9)–C(10)–C(11)–C(12)  | –178.2(3) | C(12)–C(26)–C(27)–C(28) | 0.5(5)    |
| O(1)–C(2)–C(7)–C(6)     | –179.8(4) | C(28)–C(10)–C(11)–C(12) | 0.6(5)    | C(26)–C(27)–C(28)–C(10) | –0.5(6)   |

**Table S2** Selected hydrogen bond lengths (Å) and angles (°) for **1**

| D-H...A          | <i>d</i> (D-H) | <i>d</i> (H...A) | <i>d</i> (D...A) | ∠ (DHA) |
|------------------|----------------|------------------|------------------|---------|
| O(1)-H(1)...N(9) | 0.82           | 1.90             | 2.627(4)         | 147     |

**Table S3** Selected  $\pi \cdots \pi$  interactions for **1**

| Cg( <i>I</i> ) | Cg( <i>J</i> ) | Cg-Cg (Å) | Dihedral angle (°) | $\beta$ (°) |
|----------------|----------------|-----------|--------------------|-------------|
| Cg(1)          | Cg(1)          | 5.403(2)  | 85.92              | 28.23       |
| Cg(1)          | Cg(2)          | 4.665(2)  | 12.91              | 37.78       |
| Cg(2)          | Cg(1)          | 4.665(2)  | 12.91              | 44.28       |

Cg(1): C(2)-C(3)-C(4)-C(5)-C(6)-C(7); Cg(2): C(10)-C(11)-C(12)-C(26)-C(27)-C(28)  
 $\beta$ : angle Cg(*I*) → Cg(*J*) vector and normal to plane I.
